# Supplementary material for: Peptide Drug Release Behavior from Biodegradable Temperature-Responsive Injectable Hydrogels Exhibiting Irreversible Gelation
Source: PubMed Central journal article supplement (PMC6318690; doi:10.3390/gels3040038), 2017-10-15
Supplement: gels-03-00038-s001.pdf [file gels-03-00038-s001.pdf]

**Table S1.** Characterization of PCGA-*b*-PEG-*b*-PCGA triblock copolymers (tri-PCGs)

| Code      | DP of CL <sup>a)</sup> | DP of GA <sup>b)</sup> | CL/GA <sup>c)</sup> | $M_n$ (Da) <sup>d)</sup> | $M_w$ (Da) <sup>e)</sup> | $M_w/M_n$ <sup>e)</sup> |
|-----------|------------------------|------------------------|---------------------|--------------------------|--------------------------|-------------------------|
| tri-PCG-1 | 14.6                   | 4.3                    | 3.4                 | 5,400                    | 6,900                    | 1.38                    |
| tri-PCG-2 | 9.9                    | 2.6                    | 3.9                 | 4,000                    | 4,800                    | 1.38                    |

- a) The degree of polymerization of the  $\epsilon$ -caprolactone unit in a PCGA segment was calculated using <sup>1</sup>H-NMR.  
 b) The degree of polymerization of a glycolic acid unit in a PCGA segment was calculated using <sup>1</sup>H-NMR.  
 c) Molar ratio of CL/GA in a PCGA segment estimated using <sup>1</sup>H-NMR  
 d) Number-average of the molecular weight estimated using <sup>1</sup>H-NMR.  
 e) Weight-average of the molecular weight and the polydispersity index estimated using SEC.

**Table S2.** Characterization of tri-PCG-Acryl

| Code          | $M_n$ (Da) <sup>a)</sup> | $M_w$ (Da) <sup>b)</sup> | $M_w/M_n$ <sup>b)</sup> | DS (%) <sup>c)</sup> |
|---------------|--------------------------|--------------------------|-------------------------|----------------------|
| tri-PCG-Acryl | 4,200                    | 5,100                    | 1.40                    | 91                   |

- a) Number-average of the molecular weight estimated using <sup>1</sup>H-NMR.  
 b) Weight-average of the molecular weight and the polydispersity index estimated using SEC.  
 c) Degree of substitution of the acryloyl group calculated using <sup>1</sup>H-NMR.

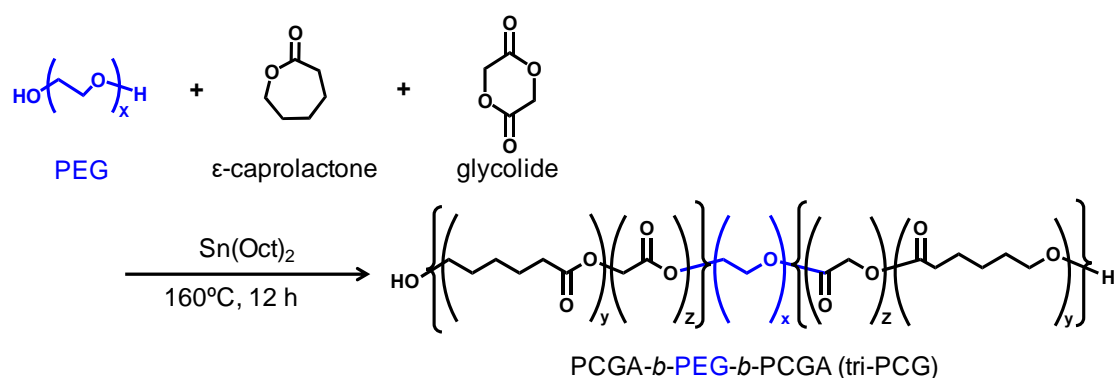**Scheme S1.** Synthesis of PCGA-*b*-PEG-*b*-PCGA triblock copolymer (tri-PCG).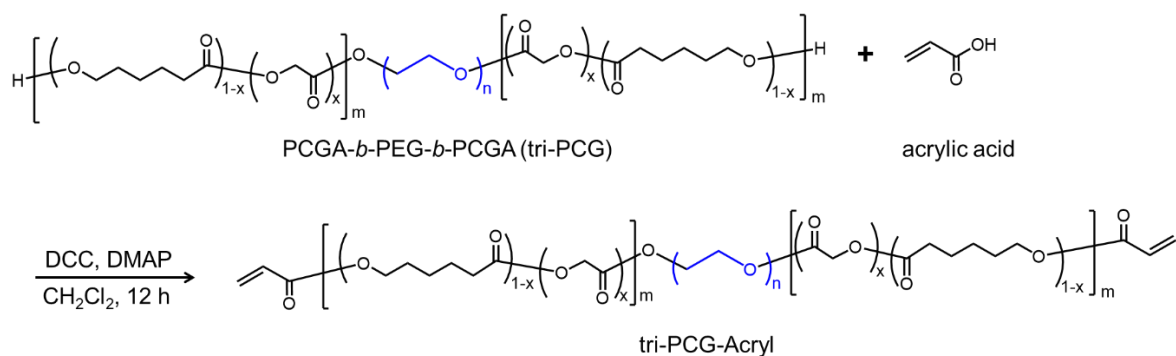

DCC: N,N'-dicyclohexylcarbodiimide  
 DMAP: 4-dimethylaminopyridine

**Scheme S2** Synthesis of tri-PCG-Acryl

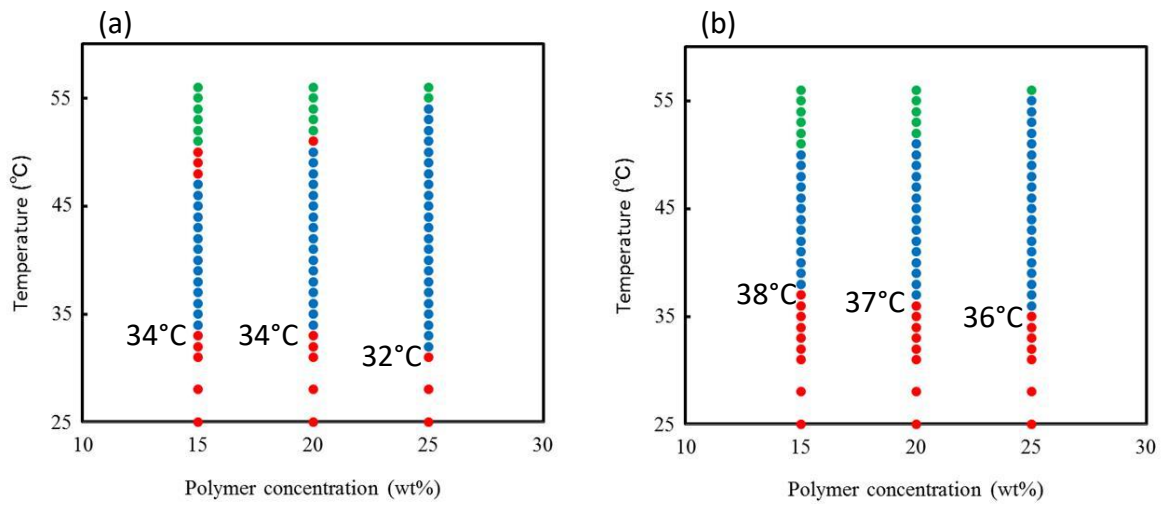

**Figure S1.** Phase diagrams of (a) tri-PCG and (b) tri-PCG-Acryl. ●: sol, ●: gel, ●: sol (syneresis). The gelation temperature ( $T_{gel}$ ) of each concentration is indicated.

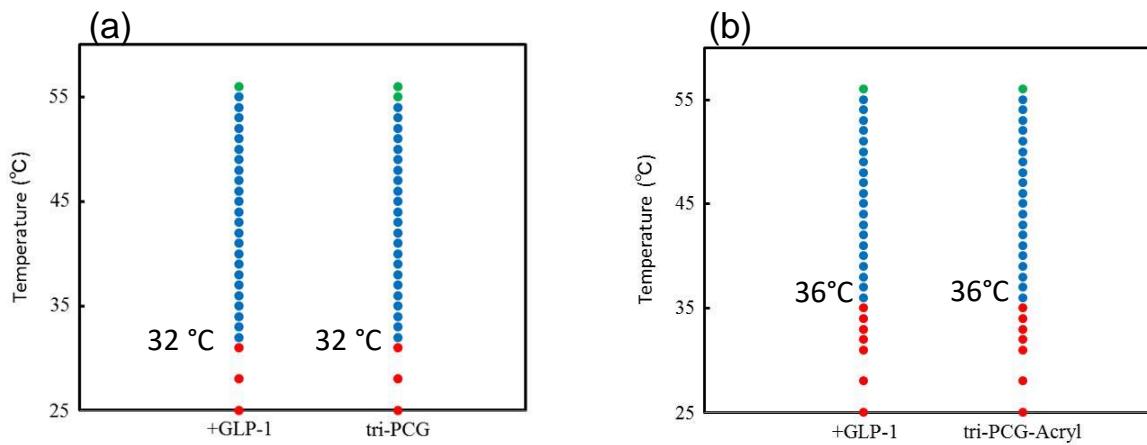

**Figure S2.** Comparison of the gelation temperature in the presence or absence of GLP-1 for (a) tri-PCG and (b) tri-PCG-Acryl. ●: sol, ●: gel, ●: sol (syneresis). The polymer concentration = 25 wt%. The gelation temperature ( $T_{gel}$ ) of each sample is indicated.

|                                       | Just after injection                                                                                    | after 1 day                                                                                             |                                                                                                       |
|---------------------------------------|---------------------------------------------------------------------------------------------------------|---------------------------------------------------------------------------------------------------------|-------------------------------------------------------------------------------------------------------|
| <b><i>F(P1)</i></b>                   | Outside appearance<br>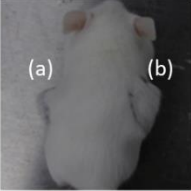 | Outside appearance<br> | Under the skin<br> |
| <b><i>F(P1/D+PA<sub>40</sub>)</i></b> |                        |                        |                    |

**Figure S3.** Photographs of the rats injected with ***F(P1)*** without GLP-1 (top) and ***F(P1/D+PA<sub>40</sub>)*** without GLP-1 just after injection, and after 1 day.
